# Supplementary material
Source: MDPI journal article supplement (https://www.mdpi.com/2075-4698/8/1/12)
Supplement: s1 [file s1]

This is an English translation from the original questionnaire in Japanese. The purpose is to make it accessible to the readers, and it is not intended to be applied in an actual survey.

  

## Attitude Survey of Social Participation and the Body

—Developing a Method of Scoring “Difficulties in  
Participation”—

(Name)

(Affiliation)

(E-mail address)



The survey above is now being carried out on the NTTCom research monitors. Please understand the objective of the survey and answer the questions.

Our life is based on participation in society. However, it is said that social participation becomes difficult when bodily conditions are changed by injuries and illnesses. If so, how difficult would social participation become with various bodily conditions? This survey tries to “score” the difficulties in participation. Its result will be made public in an article or conference presentation.

The survey is anonymous. All data are statistically processed without specifying individuals. Complete privacy is ensured, and your answer will only be used for the purpose of this survey.

Whether you answer or not is at your will. There will be no disadvantage when you choose not to answer. People who answer the survey will get fixed points from NTTCom Research.

Please send an e-mail if you have any question about the survey.

Your cooperation would be appreciated.

Q 1 Below is a list of physical and mental conditions. Some might negatively affect one's social life such as work, school life, marriage, housework, and childcare. In your view, to what extent does each condition impact one's social life? To make sure, please choose "Not adverse at all" (1) in the first row.

|         |                              | Not adverse<br>at all | ← | → | Extremely<br>adverse |     |
|---------|------------------------------|-----------------------|---|---|----------------------|-----|
| XCHECK  | Choose "Not adverse at all"  | 1                     | 2 | 3 | 4                    | 5 6 |
| XBLIND  | Unable to see                | 1                     | 2 | 3 | 4                    | 5 6 |
| XONEEYE | Blind in one eye             | 1                     | 2 | 3 | 4                    | 5 6 |
| XDEAF   | Unable to hear               | 1                     | 2 | 3 | 4                    | 5 6 |
| XDFBLND | Unable to see and hear       | 1                     | 2 | 3 | 4                    | 5 6 |
| XSMELL  | Unable to smell              | 1                     | 2 | 3 | 4                    | 5 6 |
| XTASTE  | Unable to taste              | 1                     | 2 | 3 | 4                    | 5 6 |
| XCOLOR  | Unable to distinguish colors | 1                     | 2 | 3 | 4                    | 5 6 |
| XWALK   | Unable to walk               | 1                     | 2 | 3 | 4                    | 5 6 |
| XWHLCHR | Using a wheelchair to move   | 1                     | 2 | 3 | 4                    | 5 6 |
| XHAND   | Unable to move one's hands   | 1                     | 2 | 3 | 4                    | 5 6 |
| XSPEAK  | Unable to speak              | 1                     | 2 | 3 | 4                    | 5 6 |

|          |                                                  | Not adverse<br>at all |   | ←————→ |   | Extremely<br>adverse |   |
|----------|--------------------------------------------------|-----------------------|---|--------|---|----------------------|---|
| XRPTWD   | Unable to speak fluently and repeat words        | 1                     | 2 | 3      | 4 | 5                    | 6 |
| XUNDWD   | Unable to understand words                       | 1                     | 2 | 3      | 4 | 5                    | 6 |
| XMEMNEW  | Unable to memorize something new                 | 1                     | 2 | 3      | 4 | 5                    | 6 |
| XALCOHOL | Unable to stop drinking alcohol                  | 1                     | 2 | 3      | 4 | 5                    | 6 |
| XCGRT    | Unable to stop smoking                           | 1                     | 2 | 3      | 4 | 5                    | 6 |
| XSLPDAY  | Feeling sleepy in the daytime                    | 1                     | 2 | 3      | 4 | 5                    | 6 |
| XDEPR    | Feeling depressed and feeling like doing nothing | 1                     | 2 | 3      | 4 | 5                    | 6 |
| XHALLUC  | Hallucinating or having delusions                | 1                     | 2 | 3      | 4 | 5                    | 6 |
| XFEARP   | Afraid of meeting others                         | 1                     | 2 | 3      | 4 | 5                    | 6 |
| XLITTLE  | Extremely small in size                          | 1                     | 2 | 3      | 4 | 5                    | 6 |
| XOWGHT   | Very overweight                                  | 1                     | 2 | 3      | 4 | 5                    | 6 |
| XTHIN    | Very thin                                        | 1                     | 2 | 3      | 4 | 5                    | 6 |
| XBTHMK   | Having a birthmark on the face                   | 1                     | 2 | 3      | 4 | 5                    | 6 |
| XNOHAIR  | Having no hair                                   | 1                     | 2 | 3      | 4 | 5                    | 6 |

|          |                                                    | Not adverse<br>at all |   |   | ← | → | Extremely<br>adverse |  |
|----------|----------------------------------------------------|-----------------------|---|---|---|---|----------------------|--|
| XPAIN    | Always feeling pain somewhere<br>in the body       | 1                     | 2 | 3 | 4 | 5 | 6                    |  |
| XLBPAIN  | Unable to keep sitting due to<br>lower-back pain   | 1                     | 2 | 3 | 4 | 5 | 6                    |  |
| XFATIGUE | Getting tired extremely easily                     | 1                     | 2 | 3 | 4 | 5 | 6                    |  |
| XSHRFL   | Totally unable to understand<br>other's feelings   | 1                     | 2 | 3 | 4 | 5 | 6                    |  |
| XHYPA    | Unable to stay still                               | 1                     | 2 | 3 | 4 | 5 | 6                    |  |
| XREAD    | Unable to read letters, though<br>able to see them | 1                     | 2 | 3 | 4 | 5 | 6                    |  |

The following questions briefly ask about you.

GD, AG      Q 2      What is your sex and age?

1. Male      2. Female      Age: (                      ) years old

SERINJ Q 3 Have you experienced a serious injury or illness?

1. Yes      2. No

SRHLTH Q 4 How is your current health status?

Good

1.                      2.                      3.                      4.                      5.

Poor

LSTSCH Q 5 What is the school you have last completed?

If you have completed a vocational school, please choose the school before that.

| (Postwar schools)     | (Prewar schools)                                        |
|-----------------------|---------------------------------------------------------|
| 1. Junior high school | 7. Elementary school                                    |
| 2. High school        | 8. Higher elementary school                             |
| 3. Technical college  | 9. Junior high school, girl's high school               |
| 4. Junior college     | 10. Trade school                                        |
| 5. University         | 11. Normal school                                       |
| 6. Graduate school    | 12. High school, technical school, higher normal school |
|                       | 13. University, graduate school                         |
|                       | 14. Don't know                                          |

HHINC      Q 6      How much was your family income before taxation last year including your family members'? Please include all sources of income, e.g. dividends, pensions, profits from real estate etc.

1. Less than ¥2 million
2. ¥2 million to less than ¥4 million
3. ¥4 million to less than ¥6 million
4. ¥6 million to less than ¥8 million
5. ¥8 million to less than ¥10 million
6. ¥10 million to less than ¥12 million
7. ¥12 million to less than ¥14 million
8. ¥14 million and more
9. Don't know
10. Don't want to answer

Thank you for your cooperation.
